# Supplementary material
Source: Springer Nature journal article supplement (https://www.springermedizin.de/resource/supplementary/13002_2010_196_MOESM2_ESM.pdf/9627360)

Kara Kwego Total

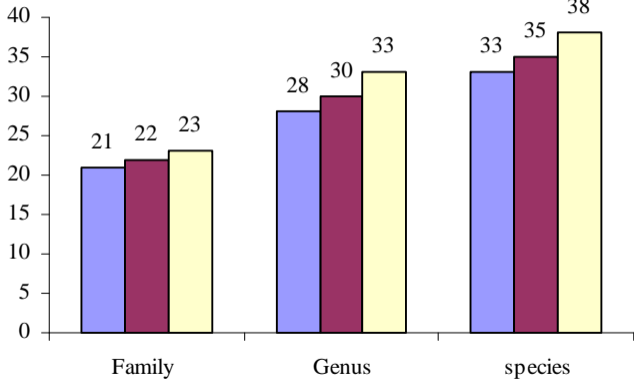

Supplement: MOESM2 [file 9627360]
